# Supplementary material for: Nanoparticles highly loaded with gentamicin sulfate by a combination of polyhydroxylated macromonomers and ROMP for the synthesis of bioactive biomaterials
Source: Royal Society of Chemistry journal article supplement (doi:10.1039/c6py01774f), 2016-01-01

## Supporting Information for

# Highly loaded nanoparticles with Gentamicin Sulfate by combination of polyhydroxylated macromonomers and ROMP for the synthesis of bioactive biomaterials

*Loïc Pichavant<sup>a;b</sup>, Hélène Carrié<sup>a;b</sup>, Marie-Christine Durrieu<sup>b</sup> and Valérie Héroguez<sup>a</sup>*

<sup>a</sup> Université de Bordeaux, LCPO, UMR 5629, F-33600 Pessac, France. CNRS, LCPO, UMR 5629, F-33600 Pessac, France

<sup>b</sup> Université de Bordeaux, CBMN, UMR 5248, F-33600 Pessac, France ; CNRS, CBMN, UMR 5248, F-33600 Pessac France ; Bordeaux INP, CBMN, UMR 5248, F-33600 Pessac, France

CORRESPONDING AUTHOR Valérie Héroguez, Université de Bordeaux, LCPO, UMR 5629, F-33600 Pessac, France. CNRS, LCPO, UMR 5629, F-33600 Pessac, France

Tel: +33 (0) 5 40 00 22 28

Fax: +33 (0) 5 40 00 84 87

Email: heroguez@enscbp.fr

- S1:  $^1\text{H}$  NMR spectrum of ethoxylethyl glycidyl ether (2)**
- S2:  $^1\text{H}$  NMR spectrum of poly(ethoxyethyl glycidyl ether) macromonomer (3)**
- S3: SEC traces of  $\alpha$ -norbornenyl-poly(ethylene oxide)-*b*-polyglycidol based macromonomers (5), (6) and (7)**
- S4:  $^1\text{H}$  NMR spectrum of the modified macromonomers (4) and (8)**
- S5:  $^1\text{H}$  NMR spectrum of Gentamicin sulfate**
- S6:  $^1\text{H}$  NMR spectrum of the GS-modified macromonomer (10)**
- S7: Macromonomer conversion measurements**
- S8: Determination of the amount of GS per NPs**
- S9: FR-IR spectra of macromonomer (11) and nanoparticles NP6**

**S1:  $^1\text{H}$  NMR spectrum of ethoxyethyl glycidyl ether (2)**

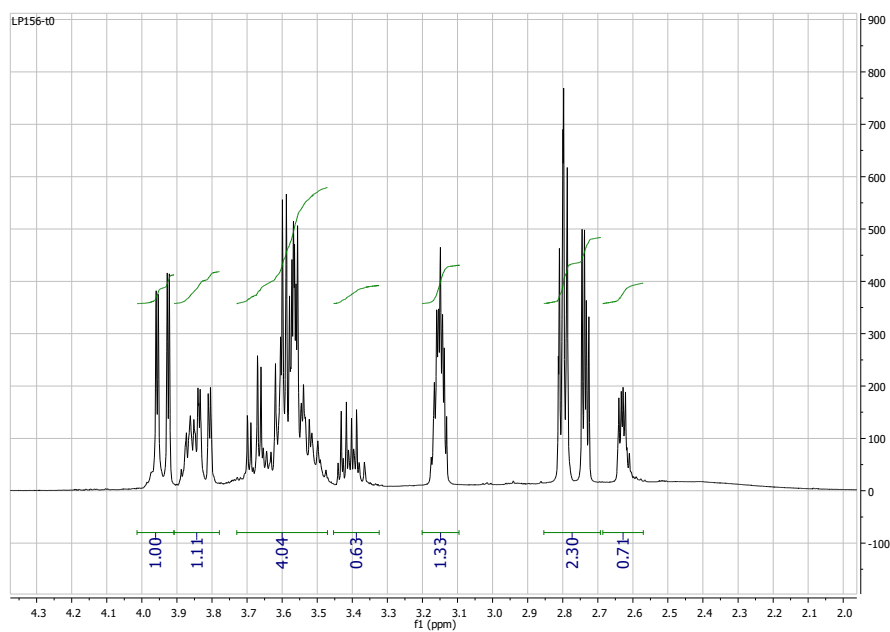

**S2:  $^1\text{H}$  NMR spectrum of poly(ethoxyethyl glycidyl ether) macromonomer (3)**

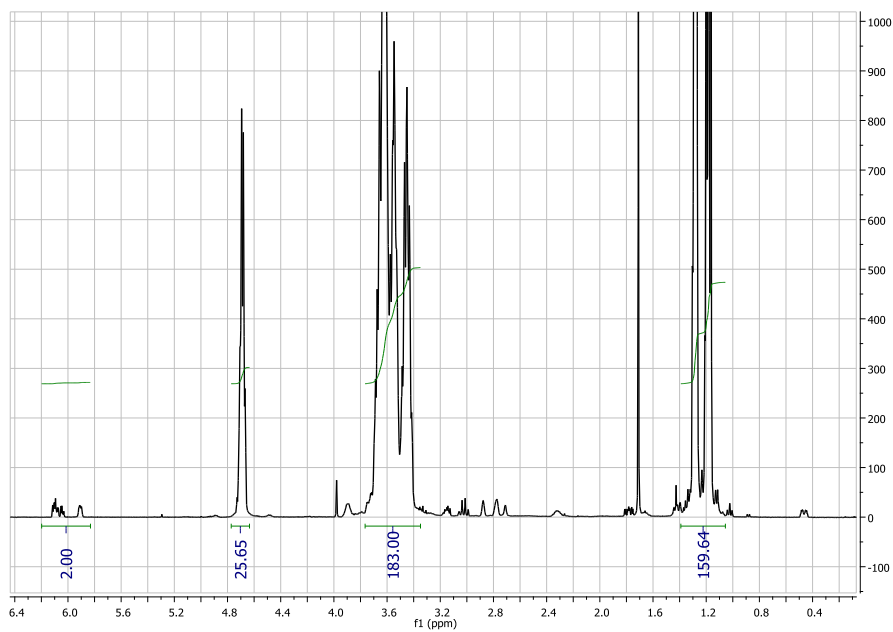

**S3: SEC traces of  $\alpha$ -norbornenyl-poly(ethylene oxide)-*b*-polyglycidol based macromonomers (5), (6) and (7)**

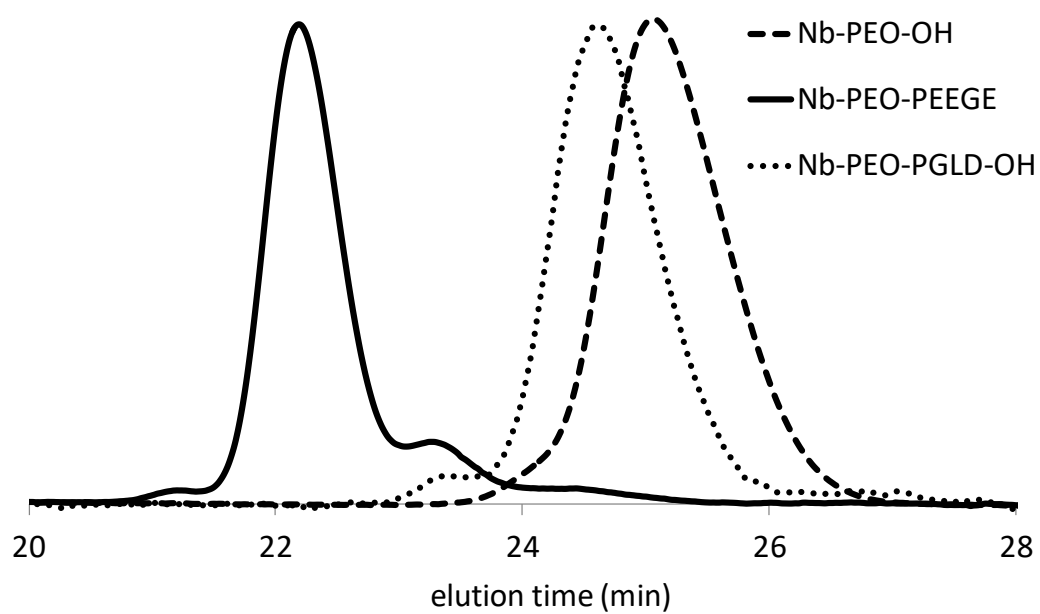

#### S4: $^1\text{H}$ NMR spectrum of the modified macromonomers (4) and (8)

Macromonomer (4):

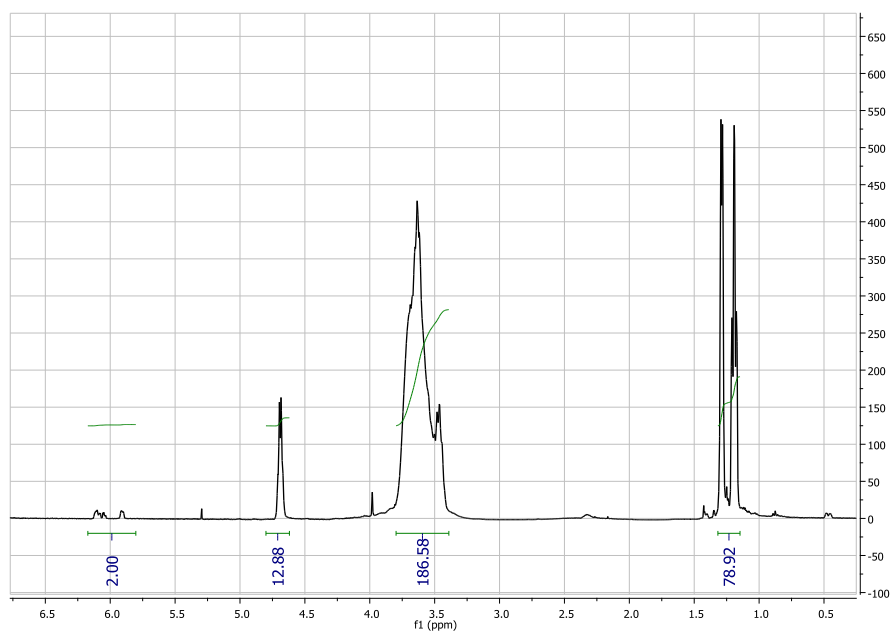

Macromonomer (8):

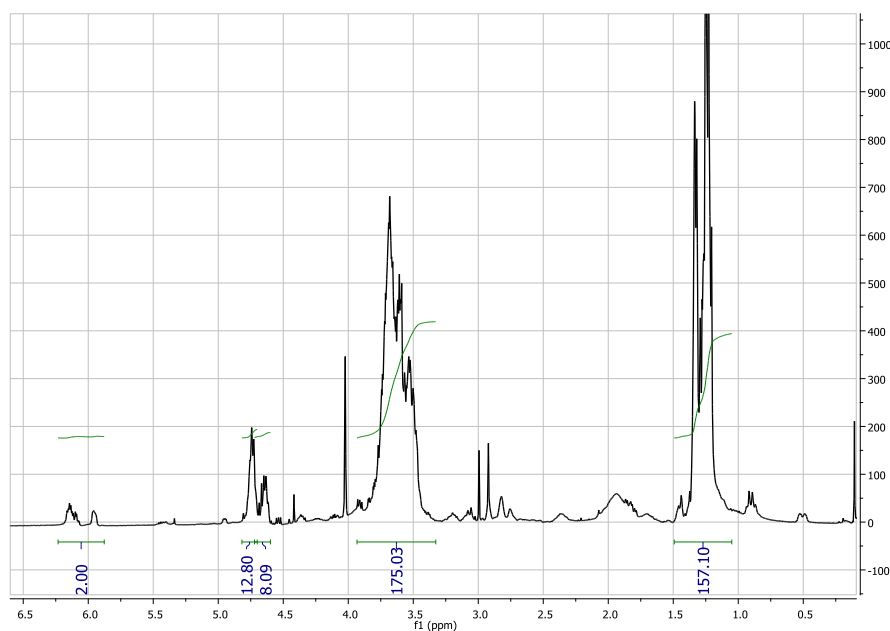

### S5: $^1\text{H}$ NMR spectrum of Gentamicin sulfate

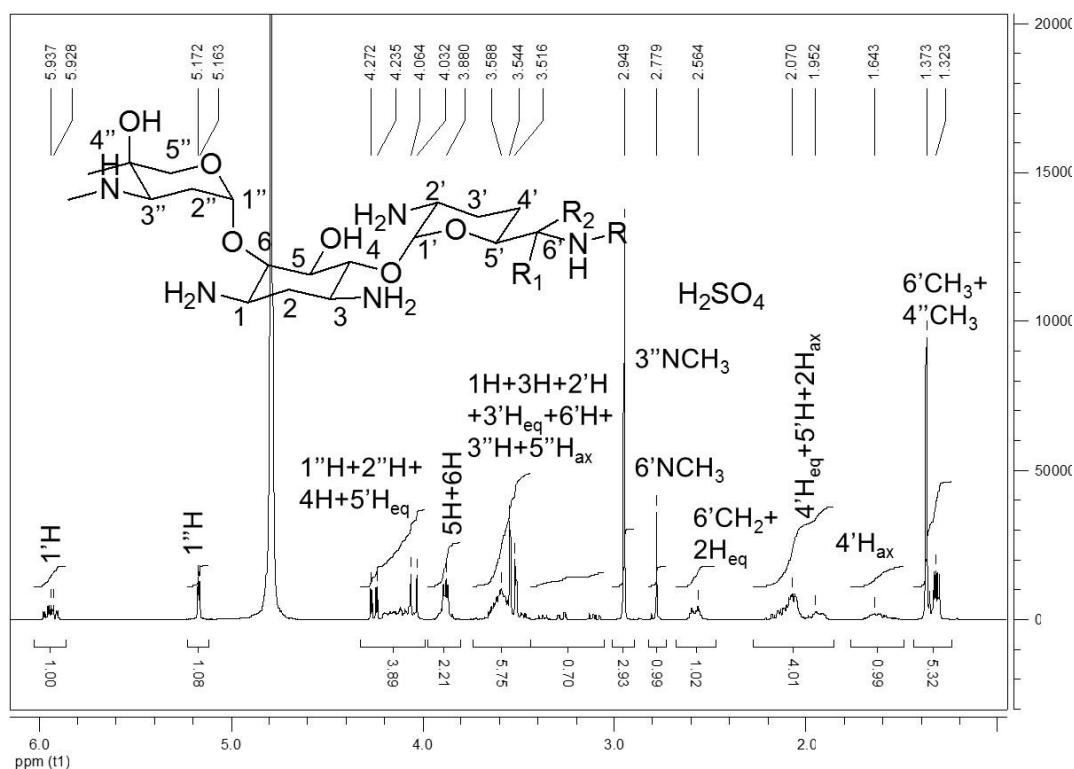

### S6: $^1\text{H}$ NMR spectrum of the GS-modified macromonomer (10)

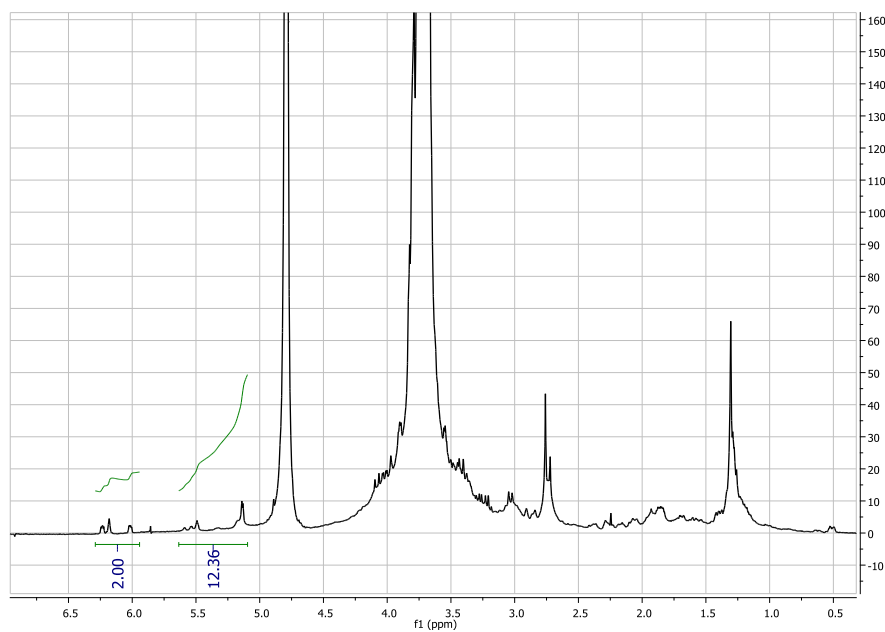

## S7: Macromonomer conversion measurements

Macromonomer conversions were measured by gravimetric analyses. 1 mL of dispersion was first filtrated with a 0.1  $\mu\text{m}$  PTFE filter, then the filtrate volume was measured ( $V_f$ ), and finally this filtrate was evaporated under vacuum overnight in order to keep only the unreacted macromonomers. This residual macromonomers were weighed ( $m_{\text{macro}}^f$ ) and compared to the initial mass. The macromonomer conversion can be calculated with the following equation:

$$\pi_{\text{macro}} = 1 - \frac{m_{\text{macro}}^f/V_f}{m_{\text{macro}}^i/V_i}$$

With,

- $m_{\text{macro}}^i$  the initial weight of macromonomers introduced of the reaction
- $V_i$  the initial volume

For this calculation, we approximated that the weight of the residual Grubbs catalyst is negligible.

## S8: Determination of the amount of GS per NPs

*Determination of the Gentamicin concentration in the latex:*

The GS concentration in the latex can be calculated with the following equation:

$$C_{GS} = \frac{\pi \times 8 \times n_{Macro-GS} \times M_{GS}}{m_{Nb} + \pi(m_{Macro-GS} + m_{Macro-COOH})}$$

With:

- 8 is the amount of GS molecule linked on a macromonomer
- $n_{Macro-GS}$  the initial amount of macromonomer functionalized with GS
- $M_{GS}$  the molecular weight of Gentamicin
- $m_i$  the initial weight of compound i
- $\pi$  the conversion of the macromonomers

For this calculation, we assumed that the macromonomers are consumed at the same time regardless the functionalization

| NPs             | NP3 | NP4 | NP5 | NP6 |
|-----------------|-----|-----|-----|-----|
| $C_{GS}$ (mg/g) | 245 | 149 | 115 | 182 |

*Determination of the GS amount per NPs:*

Knowing the GS concentration in the latex and the volume of an NPs we can approximate the GS amount per NPs:

$$N_{GS/NP} = \frac{C_{GS} \times \rho_{NP} \times V_{NP} \times N_A}{M_{GS}}$$



with:

-  $C_{GS}$ : Gentamicin concentration in the latex (in mg/g)

-  $\rho_{NP}$ : latex density approximated to equal to 1 g/mL

-  $V_{NP}$ : volume of a NP ( $V_{NP} = \pi D_{NP}^3 / 6$ )

-  $N_A$ : Avogadro number

-  $M_{GS}$ : molecular weight of Gentamicin

| NPs         | NP3             | NP4             | NP5              | NP6             |
|-------------|-----------------|-----------------|------------------|-----------------|
| $N_{GS}/NP$ | $38 \cdot 10^6$ | $14 \cdot 10^6$ | $2.4 \cdot 10^6$ | $32 \cdot 10^6$ |

### S9: FR-IR spectra of macromonomer (11) and nanoparticles NP6

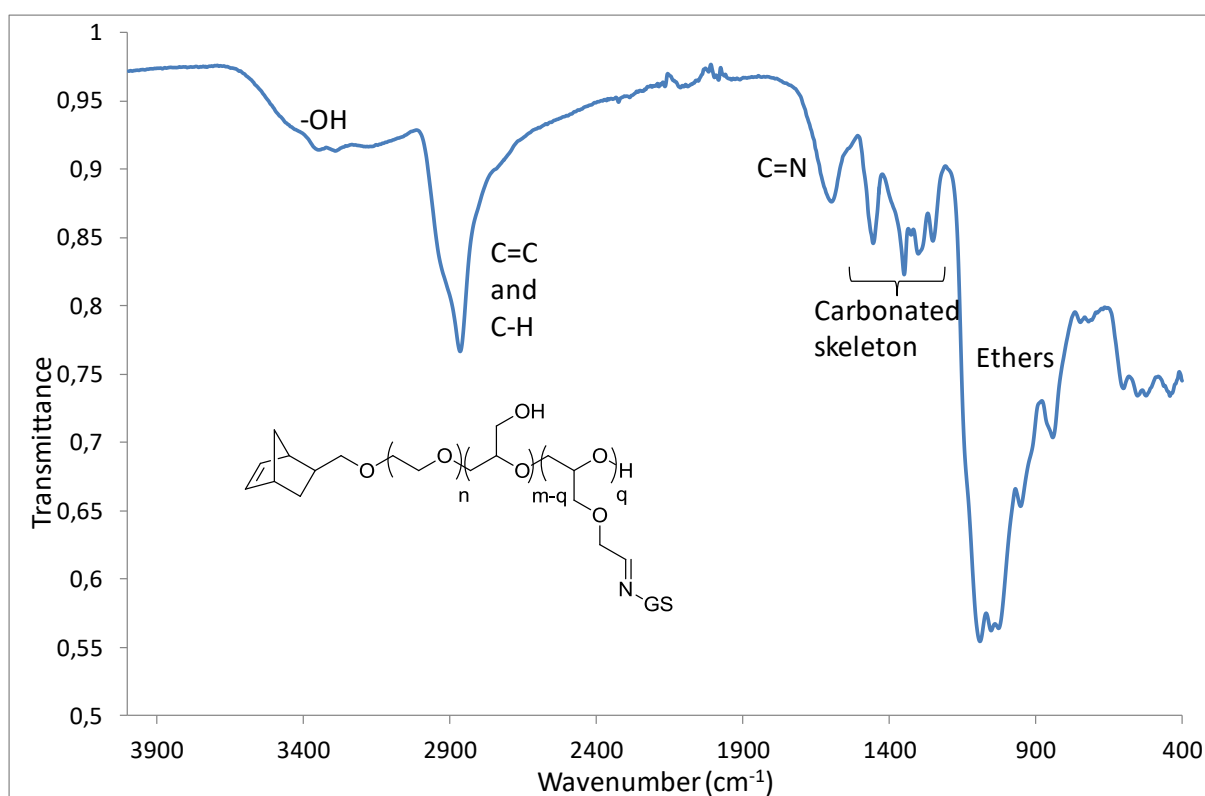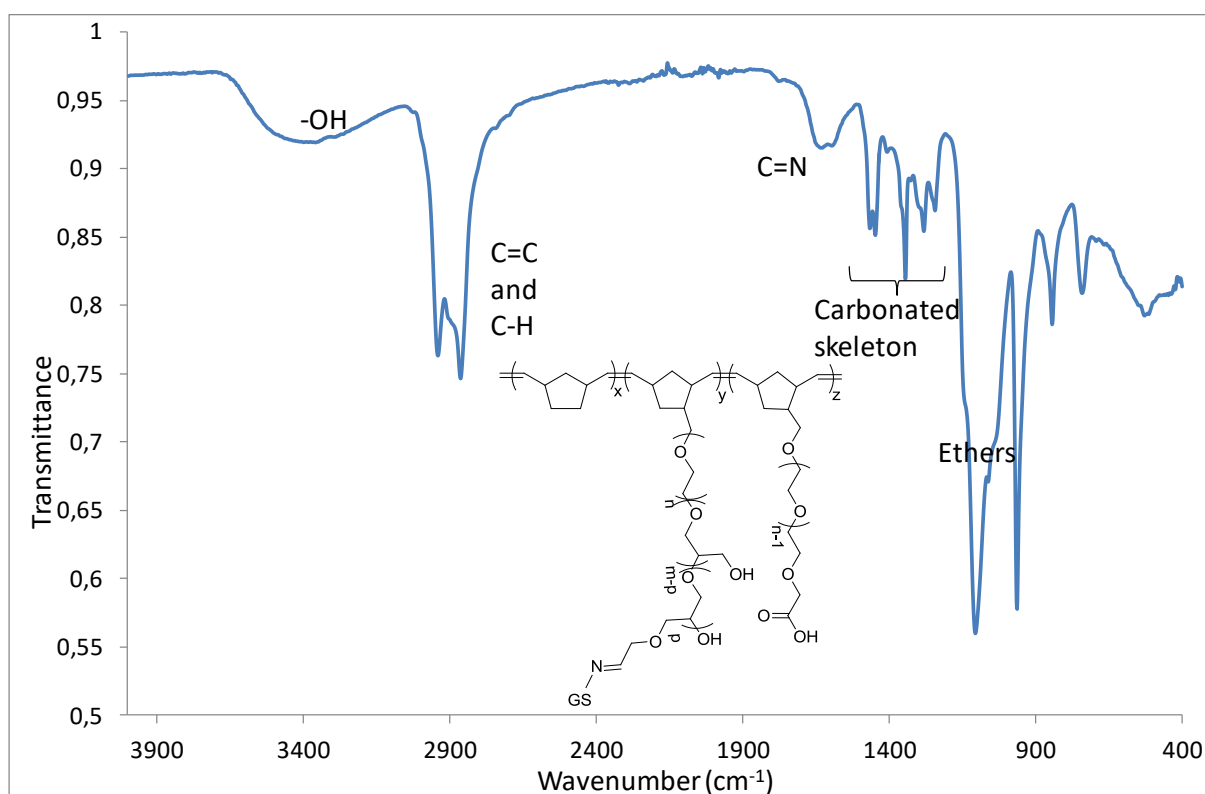

Supplement: c6py01774f1.pdf [file c6py01774f1.pdf]
